# Supplementary material
Source: PubMed Central journal article supplement (PMC3907237)
Supplement: mmc1.pdf [file mmc1.pdf]

# Differentiation of Col I and Col III isoforms in stromal models of ovarian cancer by analysis of Second Harmonic Generation polarization and emission directionality

Karissa Tilbury,<sup>1†</sup> Chi-Hsiang Lien<sup>1,2†</sup>, Shean-Jen Chen<sup>2</sup>  
and Paul J. Campagnola<sup>1,3\*</sup>

<sup>1</sup>Department of Biomedical Engineering, University of Wisconsin-Madison, Madison, WI 53706, USA.

<sup>2</sup>Department of Engineering Science, National Cheng Kung University, Tainan 701, Taiwan

<sup>3</sup>Medical Physics Department, University of Wisconsin-Madison, Madison, WI 53706, USA.

\*[pcampagnola@wisc.edu](mailto:pcampagnola@wisc.edu)

†denotes equal contributions

## Supplemental Information:

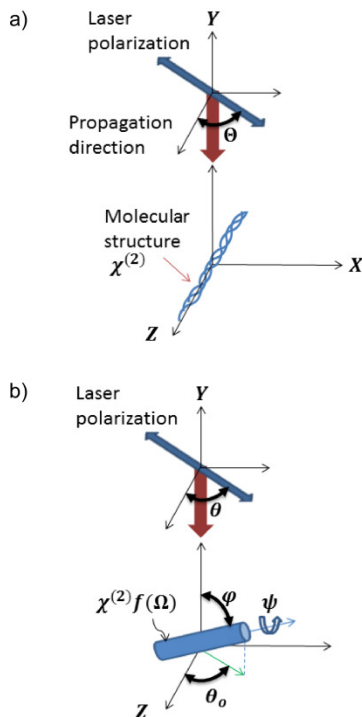

Figure S1. Definitions of coordinate systems used in the single axis molecular model (a) and the generic model (b). Y is the axis of propagation of the laser in both cases. For the former,  $\chi^{(2)}$  is the nonlinear susceptibility tensor from hyperpolarizability of the molecular structure and  $\theta$  is the angle between the laser polarization and Z axis on the incident plane. In the latter, the Euler angles are set to  $\Omega = (\theta, \varphi, \psi)$ , where  $\psi$  is the angle between the major axis of the distribution of dipole moments with the PSF and its higher cylindrical symmetry axis, i.e. the distribution along the major fibril axis as an equivalent fiber axis,  $\varphi$  is the angle between this axis and the Y axis, and  $\theta$  is the angle relative to the Z axis between the laser polarization and distribution of dipole moments along the major fibril axis projected onto the incident plane (XZ).
